# Supplementary material
Source: PubMed Central journal article supplement (PMC9560758)
Supplement: mmc1.pdf [file mmc1.pdf]

# THE LANCET Microbe

## Supplementary appendix

This appendix formed part of the original submission and has been peer reviewed. We post it as supplied by the authors.

Supplement to: Tang L, Zhang R, Cui M, Hong P. Omicron-adapted vaccines might require longer follow-up to reveal true benefits. *Lancet Microbe* 2022; published online Oct 13. [https://doi.org/10.1016/S2666-5247\(22\)00258-0](https://doi.org/10.1016/S2666-5247(22)00258-0).

## APPENDIX

# Omicron-adapted vaccines might require longer follow-up to reveal true benefits

Lu Tang, Ruihua Zhang, Miao Cui, Peng Hong

## CONTENTS

- Supplementary Figures and Legends ----- 2
  - Figure S1. Simplified scheme of bivalent omicron-adapted booster-elicited expansion of neutralisation breadth.
- Supplementary References ----- 3

## SUPPLEMENTARY FIGURES AND LEGENDS

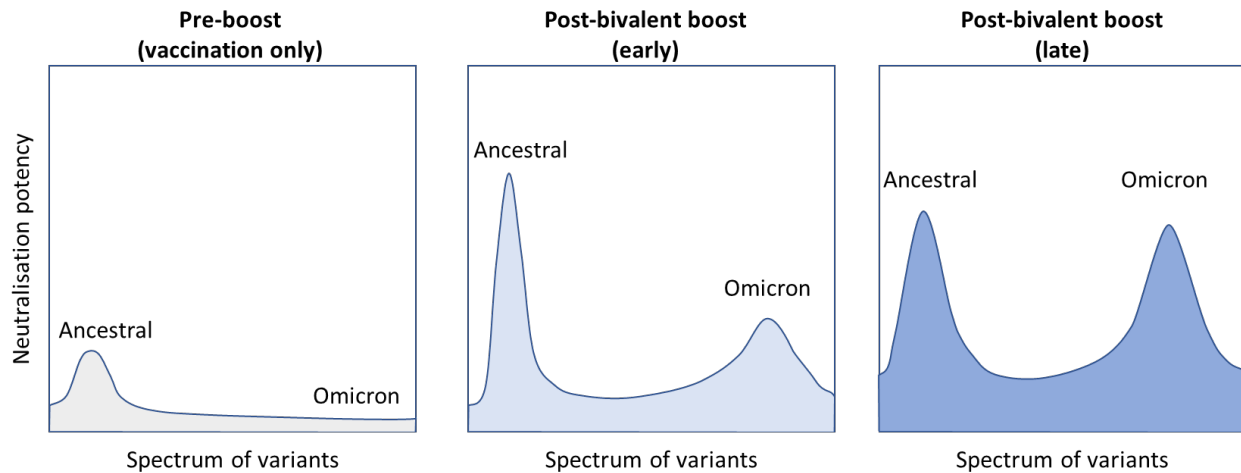

**Figure S1. Simplified scheme of bivalent omicron-adapted booster-elicited expansion of neutralisation breadth.**

These illustrations represent the authors' prediction of humoral immune response to bivalent boost vaccination. **(Left)** Pre-boost, vaccination only, and variant-naïve individuals would develop a B cell pool secreting highly potent neutralising antibodies against ancestral SARS-CoV-2 antigens and a broad spectrum of neutralising antibodies against variants, a typical outcome of long-term affinity maturation process.<sup>1,2</sup> **(Middle)** At early stage (e.g. within 30 days) after Wuhan-Hu-1/omicron bivalent boost vaccination, exposure to ancestral and omicron antigens would induce clonal expansion of B cells that recognize these antigens.<sup>3</sup> Due to the characteristics of the existing B cell pool, most high-potency neutralising antibodies would be derived from cells targeting Wuhan-Hu-1 antigens, whereas omicron-neutralising antibodies would only target epitopes shared with Wuhan-Hu-1 and have sub-optimal affinity to omicron-specific antigens.<sup>4</sup> **(Right)** At late stage (e.g. 30-90 days) after bivalent vaccination, B cells that recognize omicron antigens would undergo affinity maturation to improve antibody affinity and breadth, resulting in higher neutralisation potency against omicron (peak of the curve) and broad neutralisation breadth against other variants (valley of the curve).<sup>2,5</sup> Wuhan-Hu-1 neutralising antibodies already with high affinity due to long-term affinity maturation since first vaccination would thus benefit less from further affinity maturation after bivalent boost vaccination.<sup>6</sup> Instead, all neutralisation titers would undergo immune decay at this stage and later.<sup>7</sup>

## SUPPLEMENTARY REFERENCES

1. McHeyzer-Williams M, Okitsu S, Wang N, McHeyzer-Williams L. Molecular programming of B cell memory. *Nat Rev Immunol* 2011; **12**(1): 24-34.
2. Lee JH, Sutton HJ, Cottrell CA, et al. Long-primed germinal centres with enduring affinity maturation and clonal migration. *Nature* 2022; **609**(7929): 998-1004.
3. Kaku CI, Bergeron AJ, Ahlm C, et al. Recall of preexisting cross-reactive B cell memory after Omicron BA.1 breakthrough infection. *Sci Immunol* 2022; **7**(73): eabq3511.
4. Quandt J, Muik A, Salisch N, et al. Omicron BA.1 breakthrough infection drives cross-variant neutralization and memory B cell formation against conserved epitopes. *Sci Immunol* 2022: eabq2427.
5. Sokal A, Chappert P, Barba-Spaeth G, et al. Maturation and persistence of the anti-SARS-CoV-2 memory B cell response. *Cell* 2021; **184**(5): 1201-13 e14.
6. Zhu Y, Lu Y, Tang L, et al. Finite neutralisation breadth of omicron after repeated vaccination. *Lancet Microbe* 2022.
7. Vanshylla K, Di Cristanziano V, Kleipass F, et al. Kinetics and correlates of the neutralizing antibody response to SARS-CoV-2 infection in humans. *Cell Host Microbe* 2021; **29**(6): 917-29 e4.
